# Supplementary material
Source: publisher figshare collection journal article supplement (https://frontiersin.figshare.com/ndownloader/files/22448471)
Supplement: Supplementary file 1 [file 22448471]

**Supporting information**

**Leaf trait sampling protocol**

In all locations, based on the most recently available census and diameter data (year 2013), species that contributed to 80% of plot basal area (a proxy for plot biomass or crown area) were selected for sampling. For each species, individual trees were chosen (3-5 in Peru, 3 in Brazil and Ghana) and one fully sunlit canopy branch was collected by tree climbers. Branches and leaves were chosen with minimal damage (i.e. herbivory). Three (Ghana and Brazil) or up to five (Peru) leaves from each branch were selected for analyses (simple leaves form single-leaves species or individual leaflets from compound-leaved species - both referred to as ‘leaf’ below). The trait measurements followed a strict pipeline. First, climbers cut a fully sun branch, and immediately upon removal from the tree, branches were re-cut under water for photosynthesis measurements. Leaf gas exchange measurements were performed in the middle area of the leaf side of the leaf, avoiding major veins, using an open flow gas exchange system LI-6400XT (Li-Cor Inc., Lincoln, NE, USA). We measured light-saturated rate of net CO2 assimilation at ambient (400 ppm) CO2,*A*sat (µmol m–2 s–1) and light-saturated rate of maximum CO2 at assimilation at 2000 ppm CO2,*A*max (µmol m–2 s–1). All measurements were done at standardized photosynthetic photon flux density of 2000 µmol m-2 s-1 and block temperature was kept closest to ambient and constant throughout the sampling period at 30º C.

Immediately following gas exchange measurements, leaves, or all leaflets if compound, had petioles and rachis removed, scanned at 300 pixels per inch resolution with a digital flatbed scanner (Canon LiDE 110) and weighed. Leaves were then placed in an oven at 70°C and dried until the mass reached constant mass. Total leaf lamina area (cm2) was calculated from scanned images using custom MATLAB script (<https://github.com/bblonder/leafarea>). Dried leaf mass was divided by leaf area to calculate LMA. Leaf mass per area values for leaves from Brazil were analysed and presented in Neyret et al. (2016).

Dried leaf samples were transferred to the laboratory for further nutrient analysis. Details about nutrient analyses for Brazil and Ghana are found in Gvozdevaite et al (2018) and for Peru in (Asner *et al.* 2014).

**References**

Asner, G.P., Martin, R.E., Tupayachi, R., Anderson, C.B., Sinca, F., Carranza-Jimenez, L., *et al.* (2014). Amazonian functional diversity from forest canopy chemical assembly. *Proc. Natl. Acad. Sci.*, 111, 5604–5609.

BDMEP. (2017). *Banco de dados Meteorologicos para ensino e pesquisa*. *http://www.inmet.gov.br/projetos/rede/pesquisa/*.

Chiti, T., Certini, G., Grieco, E. & Valentini, R. (2010). The role of soil in storing carbon in tropical rainforests: The case of Ankasa Park, Ghana. *Plant Soil*, 331, 453–461.

Domingues, T.F., Meir, P., Feldpausch, T.R., Saiz, G., Veenendaal, E.M., Schrodt, F., *et al.* (2010). Co-limitation of photosynthetic capacity by nitrogen and phosphorus in West Africa woodlands. *Plant, Cell Environ.*, 33, 959–980.

Girardin, C.A.J., Espejob, J.E.S., Doughty, C.E., Huasco, W.H., Metcalfe, D.B., Durand-Baca, L., *et al.* (2014a). Productivity and carbon allocation in a tropical montane cloud forest in the Peruvian Andes. *Plant Ecol. Divers.*, 7, 107–123.

Girardin, C.A.J., Malhi, Y., Aragão, L.E.O.C., Mamani, M., Huaraca Huasco, W., Durand, L., *et al.* (2010). Net primary productivity allocation and cycling of carbon along a tropical forest elevational transect in the Peruvian Andes. *Glob. Chang. Biol.*, 16, 3176–3192.

Girardin, C.A.J., Malhi, Y., Feeley, K.J., Rapp, J.M., Silman, M.R., Meir, P., *et al.* (2014b). Seasonality of above-ground net primary productivity along an Andean altitudinal transect in Peru. *J. Trop. Ecol.*, 30, 503–519.

Huasco, W.H., Girardin, C. a. J., Doughty, C.E., Metcalfe, D.B., Baca, L.D., Silva-Espejo, J.E., *et al.* (2014). Seasonal production, allocation and cycling of carbon in two mid-elevation tropical montane forest plots in the Peruvian Andes. *Plant Ecol. Divers.*, 7, 125–142.

Janssen, T.A.J., Ametsitsi, G.K.D., Collins, M., Adu-Bredu, S., Oliveras, I., Mitchard, E.T.A., *et al.* (2018). Extending the baseline of tropical dry forest loss in Ghana (1984–2015) reveals drivers of major deforestation inside a protected area. *Biol. Conserv.*, 218, 163–172.

Junior, B.H.M. & Haridasan, M. (2005). Comparação da vegetação arbórea e características edáficas de um cerradão e um cerrado sensu strictoem áreas adjacentes sobre solo distrófico no leste de Mato Grosso, Brasil1. *Acta bot. bras*, 19, 913–926.

Malhi, Y., Farfán Amézquita, F., Doughty, C.E., Silva-Espejo, J.E., Girardin, C.A.J., Metcalfe, D.B., *et al.* (2014). The productivity, metabolism and carbon cycle of two lowland tropical forest plots in south-western Amazonia, Peru. *Plant Ecol. Divers.*, 7, 85–105.

Malhi, Y., Girardin, C.A.J., Goldsmith, G.R., Doughty, C.E., Salinas, N., Metcalfe, D.B., *et al.* (2015). Explaining the low growth rates and biomass of a tropical montane forest: A whole carbon budget perspective. *Prep. Submiss. to Glob. Chang. Biol.*

Malhi, Y., Silman, M., Salinas, N., Bush, M., Meir, P. & Saatchi, S. (2010). Introduction: Elevation gradients in the tropics: laboratories for ecosystem ecology and global change research. *Glob. Chang. Biol.*, 16, 3171–3175.

Maracahipes, L., Lenza, E., Marimon, B.S., Oliveira, E.A. de, Pinto, J.R.R. & Junior, B.H.M. (2011). *Estrutura e composição florística da vegetação lenhosa em cerrado rupestre na transição Cerrado-Floresta Amazônica, Mato Grosso, Brasil*. *Biota Neotrop.*

Marimon, B.S., Marimon-Junior, B.H., Feldpausch, T.R., Oliveira-Santos, C., Mews, H. a., Lopez-Gonzalez, G., *et al.* (2014). Disequilibrium and hyperdynamic tree turnover at the forest–cerrado transition zone in southern Amazonia. *Plant Ecol. Divers.*, 7, 281–292.

Marthews, T.R., Riutta, T., Oliveras, I., Urrutia, R., Moore, S., Metcalfe, D.B., *et al.* (2014). Measuring Tropical Forest Carbon Allocation and Cycling: A RAINFOR-GEM Field Manual for Intensive Census Plots. *A RAINFOR-GEM F. Man. intensive Census Plots*, 1–104.

Moore, S., Adu-Bredu, S., Duah-Gyamfi, A., Addo-Danso, S.D., Ibrahim, F., Mbou, A.T., *et al.* (2018). Forest biomass, productivity and carbon cycling along a rainfall gradient in West Africa. *Glob. Chang. Biol.*, 24, e496–e510.

Neyret, M., Bentley, L.P., Oliveras, I., Marimon, B.S., Marimon-Junior, B.H., Almeida de Oliveira, E., *et al.* (2016). Examining variation in the leaf mass per area of dominant species across two contrasting tropical gradients in light of community assembly. *Ecol. Evol.*, 6, 5674–5689.

**Table S1**. Variance Decomposition results. Variance parameter estimates for log10-transformed traits from linear mixed-effects models with an intercept and nested taxonomic random.

**Table S2**. Pearson correlation coefficients between environmental variables (columns) and leaf traits plot-environmental component (rows) for each environmental gradient. Significant correlation coefficients at p<0.05 highlighted in red, and at p< 0.001 highlighted in red and bold. Empty columns are due to lack of environmental data for one or more plots in the gradient (see table S1). In Brazil, MAP, MAT and location were not tested due to the plot proximity.

|  | **Trait** | **Elev** | **MAP** | **MAT** | **Sand** | **Clay** | **Nsoil** | **Psoil** | **Csoil** |
| --- | --- | --- | --- | --- | --- | --- | --- | --- | --- |
| **Rainfall** | Amax | -0.512 | 0.424 | -0.442 | -0.161 | 0.367 | 0.503 | 0.149 | 0.655 |
| Asat | -0.527 | 0.447 | -0.463 | -0.211 | 0.423 | 0.572 | 0.208 | 0.696 |
| LMA | 0.339 | -0.371 | 0.366 | 0.188 | -0.192 | -0.281 |  | -0.762 |
| LT | 0.529 | -0.699 | 0.673 | 0.722 | -0.623 | -0.63 | -0.527 | -0.494 |
| LDMC | 0.058 | -0.012 | 0.022 | -0.349 | 0.447 | 0.369 | 0.562 | -0.495 |
| N | 0.391 | -0.226 | 0.256 | -0.224 | -0.196 | -0.281 | -0.123 | 0.185 |
| P | 0.834 | -0.769 | 0.785 | 0.191 | -0.484 | -0.676 | -0.242 | -0.846 |
| Ca | -0.688 | 0.533 | -0.562 | 0.235 | 0.108 | 0.374 | -0.13 | **-0.907** |
| K | -0.272 | 0.515 | -0.474 | -0.743 | 0.502 | 0.531 | 0.488 | 0.304 |
| Mg | -0.496 | 0.408 | -0.426 | 0.28 | -0.021 | 0.04 | -0.09 | -0.387 |
| **Elevation** | Amax | 0.549 | -0.402 | -0.593 |  |  | 0.389 | 0.219 | 0.305 |
| Asat | 0.562 | -0.279 | -0.573 |  |  | 0.479 | 0.307 | 0.375 |
| LMA | **0.926** | -0.844 | **-0.937** |  |  | 0.807 | 0.144 | 0.806 |
| LT | **0.94** | -0.656 | **-0.933** |  |  | 0.677 | 0.15 | 0.678 |
| LDMC | -0.429 | 0.285 | 0.401 |  |  | -0.228 | -0.154 | -0.158 |
| N | 0.066 | -0.1 | -0.08 |  |  | -0.036 | 0.223 | -0.152 |
| P | 0.752 | -0.863 | -0.75 |  |  | 0.703 | 0.296 | 0.712 |
| Ca | 0.207 | -0.597 | -0.234 |  |  | 0.232 | 0.087 | 0.301 |
| K | 0.412 | -0.369 | -0.401 |  |  | 0.32 | -0.337 | 0.267 |
| Mg | -0.004 | -0.453 | -0.021 |  |  | 0.087 | 0.065 | 0.154 |
| **Forest-savanna** | Amax | -0.621 |  |  |  |  | -0.621 | -0.621 | -0.621 |
| Asat | -0.099 |  |  |  |  | -0.903 | -0.94 | -0.648 |
| LMA | 0.154 |  |  |  |  | 0.154 | 0.154 | 0.154 |
| LT | 0.554 |  |  |  |  | -0.598 | -0.493 | -0.092 |
| LDMC | 0.406 |  |  |  |  | 0.98 | 0.949 | 0.894 |
| N | -0.926 |  |  |  |  | -0.169 | -0.173 | -0.655 |
| P | 0.049 |  |  |  |  | -0.788 | -0.843 | -0.481 |
| Ca | -0.571 |  |  |  |  | -0.529 | -0.67 | -0.655 |
| K | -0.67 |  |  |  |  | -0.863 | -0.839 | -0.97 |
| Mg | 0.22 |  |  |  |  | -0.6 | -0.672 | -0.252 |

**Table S3**. Pearson correlations between leaf trait taxonomic component and richness (number of trees, number of species, number of genera, number of families).

**Table S4**. Bivariate Standard Major Axis regression coefficients for each variance component (intra-specific, species, genus, family, plot-environmental) from leaf functional traits along the elevation gradient.

**Table S5**. Bivariate Standard Major Axis regression coefficients for each variance component (intra-specific, species, genus, family, plot-environmental) from leaf functional traits along the rainfall gradient.

**Table S6**. Bivariate Standard Major Axis regression coefficients for each variance component (intra-specific, species, genus, family, plot-environmental) from leaf functional traits along the forest-savanna gradient.

**Figure S1.** Sources of variance included in the analysis. For a given trait, the intraspecific (i.e. within- species, or residual) variance includes the variance of trees within a species, the species level includes variance between species of a given genus, the genus level includes the variance genera of a same family, the family level includes the variance between taxonomic families, and the plot (environmental) level includes the abiotic variability associated to the spatial location of the study plots (e.g. topography, climate, soil).


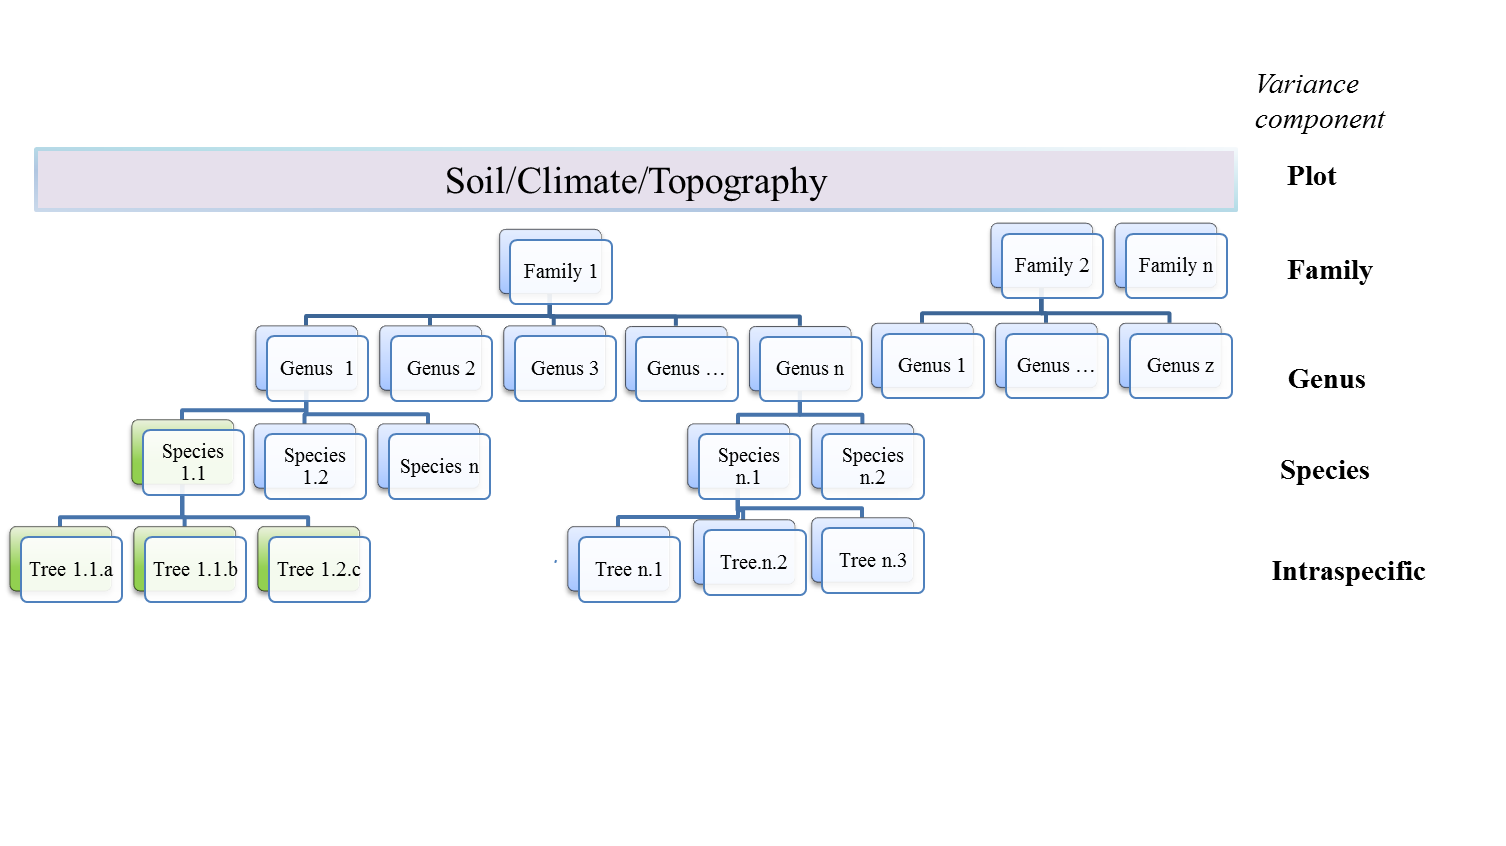


**Figure S2.** Mean and error bars for plot, species, genus, and family effect sizes (Y-axis) on each trait (X-axis), for each of the environmental gradients studied (red: elevation gradient, green: forest-savanna gradient, blue: rainfall gradient)


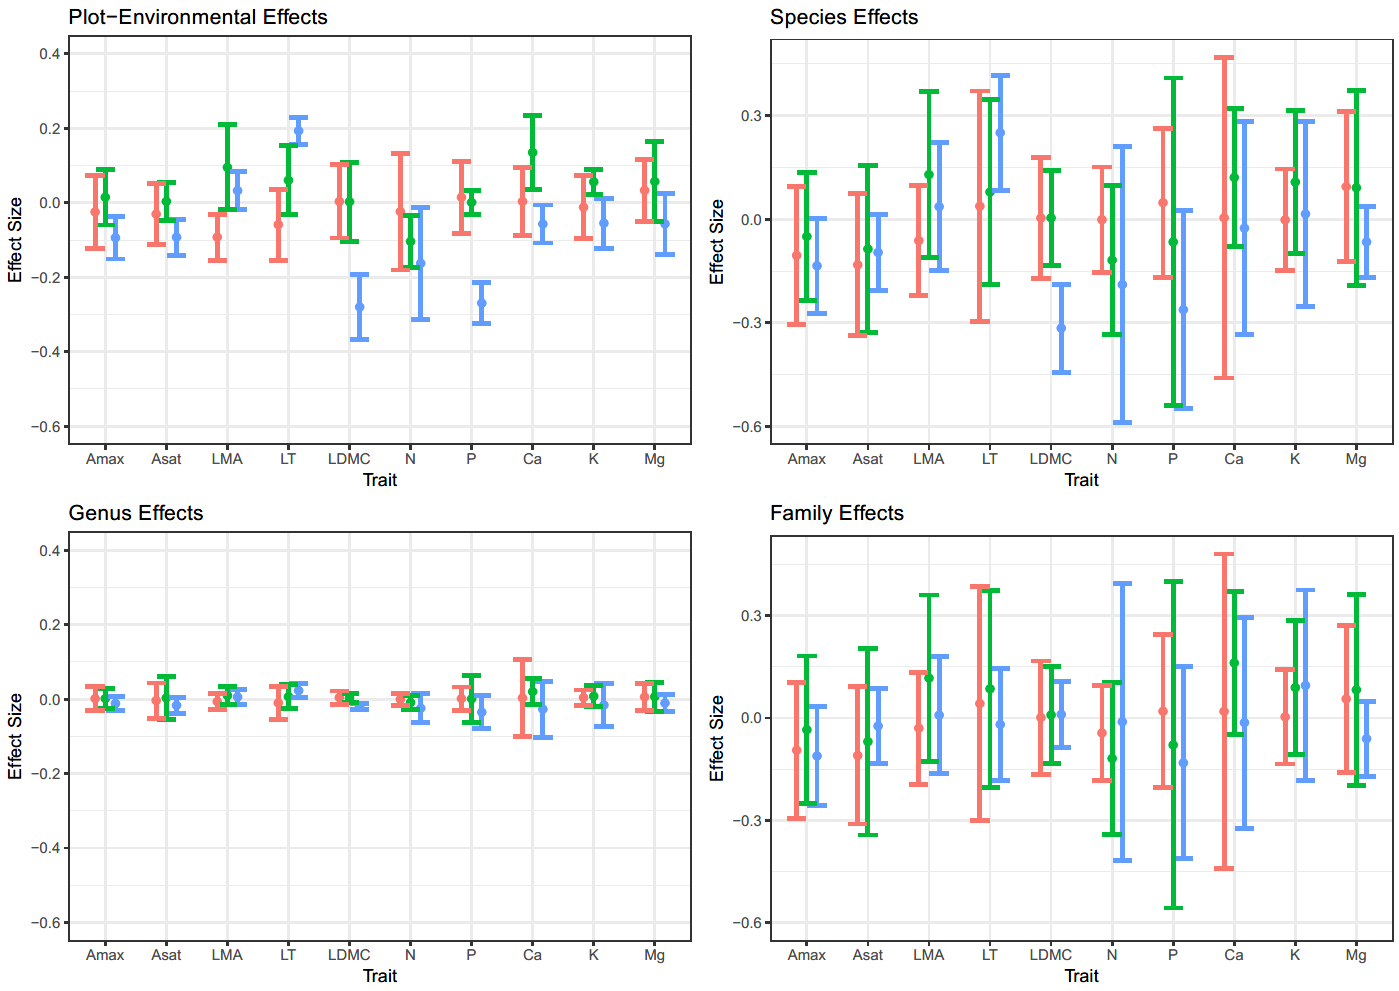


**Figure S3**. Kendall r correlation coefficients for the difference variance sources (combined effects = log transformed original data; within-species, species, genus, family) for the altitudinal gradient. Upper diagonal are significant Kendall r with Holm’s correction (*** p < 0.001; ** p < 0.01; * p<0.05) and in the lower diagonal non-corrected Kendall r coefficients.


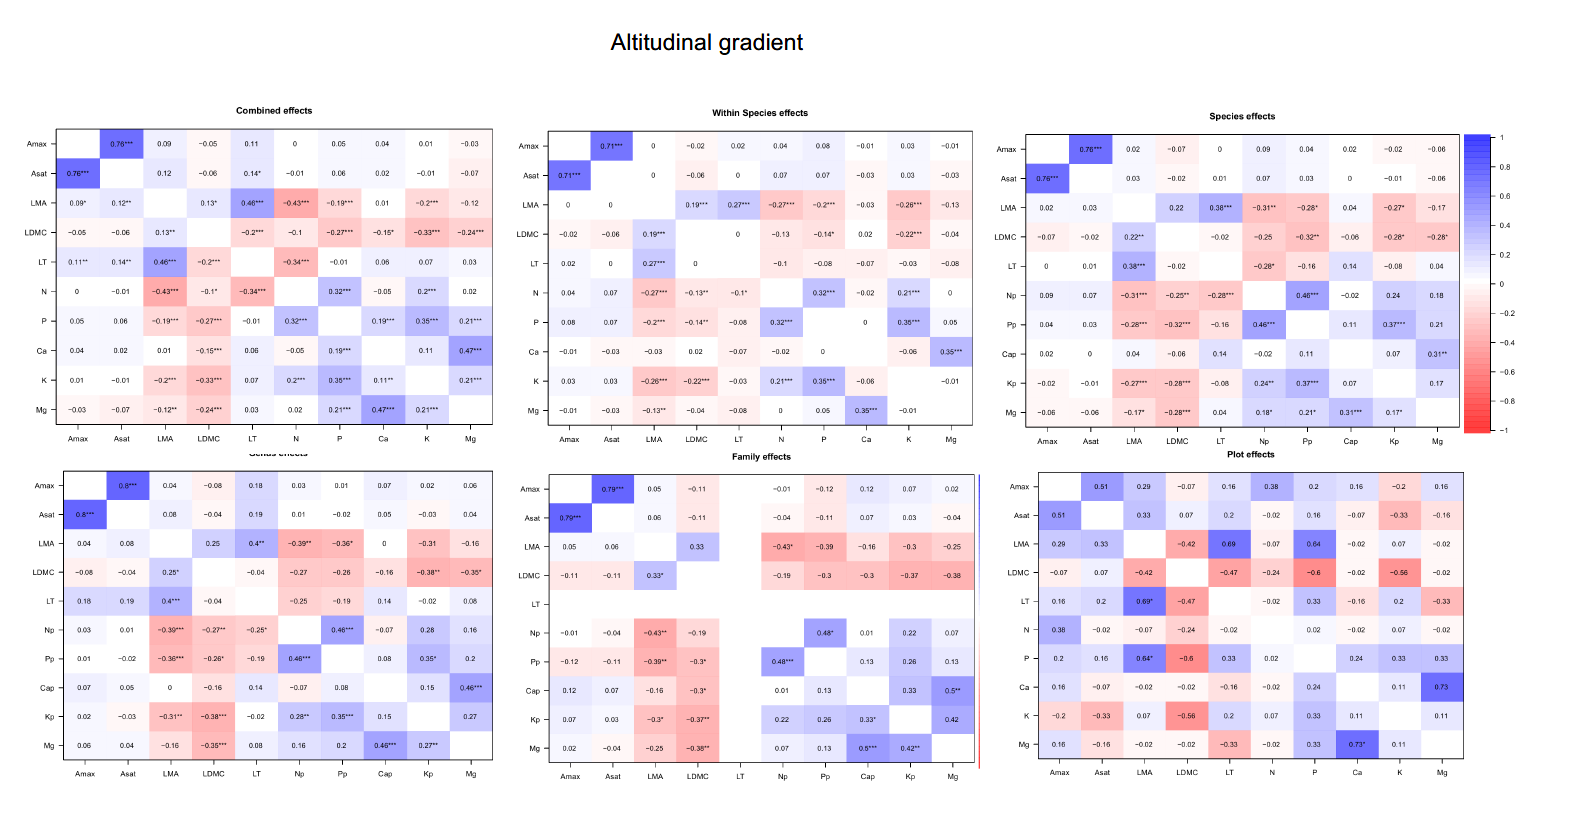
**Figure S4**. Kendall r correlation coefficients for the difference variance sources (combined effects = log transformed original data; within-species, species, genus, family, plot) for the rainfall gradient. Upper diagonal shows significant Kendall r with Holm’s correction (*** p < 0.001; ** p < 0.01; * p<0.05) and in the lower diagonal non-corrected Kendall r coefficients.

**Figure S5**. Kendall r correlation coefficients for the difference variance dimensions (combined effects = log transformed original data; within-species, species, genus, family, plot) for the forest-savanna gradient. Upper diagonal shows significant Kendall r with Holm’s correction (*** p < 0.001; ** p < 0.01; * p<0.05) and in the lower diagonal non-corrected Kendall r coefficients.

**Figure S6**. Trait dimension relationships at the altitudinal gradient. Lines are standardized major axis regressions for every species (light blue), genus (blue-grey), family (dark blue), plot (red) and the whole gradient (black).

**Figure S7.** Trait dimension relationships at the rainfall gradient. Lines are standardized major axis regressions for every species (light blue), genus (blue-grey), family (dark blue), plot (red) and the whole gradient (black).

**Figure S8.** Trait dimension relationships at the forest-savanna gradient. Lines are standardized major axis regressions for every species (light blue), genus (blue-grey), family (dark blue), plot (red) and the whole gradient (black).
